# Supplementary material
Source: Springer Nature journal article supplement (https://www.springermedizin.de/resource/supplementary/13002_2014_425_MOESM2_ESM.pdf/9626890)
Supplement: MOESM2 [file 9626890]

Sabiá

*Turdus amaurochalinus*

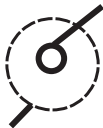

Sabiá-bico-de-osso

*Turdus leucomelas*

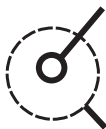

Sabiá-branca

*Turdus rufiventris*

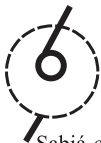

Sabiá-coca

*Mimus saturninus*

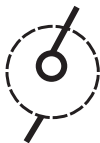

Sabiá-lasca-carne
